# Supplementary material for: C[double bond, length as m-dash]N linked covalent organic framework for the efficient adsorption of iodine in vapor and solution
Source: PubMed Central journal article supplement — RSC Adv. 2021 Mar 11;11(18):10512–23. doi: 10.1039/d0ra10587b (PMC8695655; doi:10.1039/d0ra10587b), 2021-03-11
Supplement: RA-011-D0RA10587B-s001.pdf [file RA-011-D0RA10587B-s001.pdf]

# Supplementary Information

## C=N linked covalent organic framework for efficient adsorption of iodine in vapor and solution

Sanan Song<sup>a</sup>, Yue Shi<sup>b</sup>, Ning Liu<sup>b\*</sup>, Fengqi Liu<sup>a\*</sup>

<sup>a</sup> College of Chemistry, Jilin University, Changchun, Jilin 130012, China.

<sup>b</sup> Gynecology and Oncology Department of the Second Hospital of Jilin University, Ziqiang Street 218, Changchun 130000, China

\* Corresponding authors

# 1. Figures

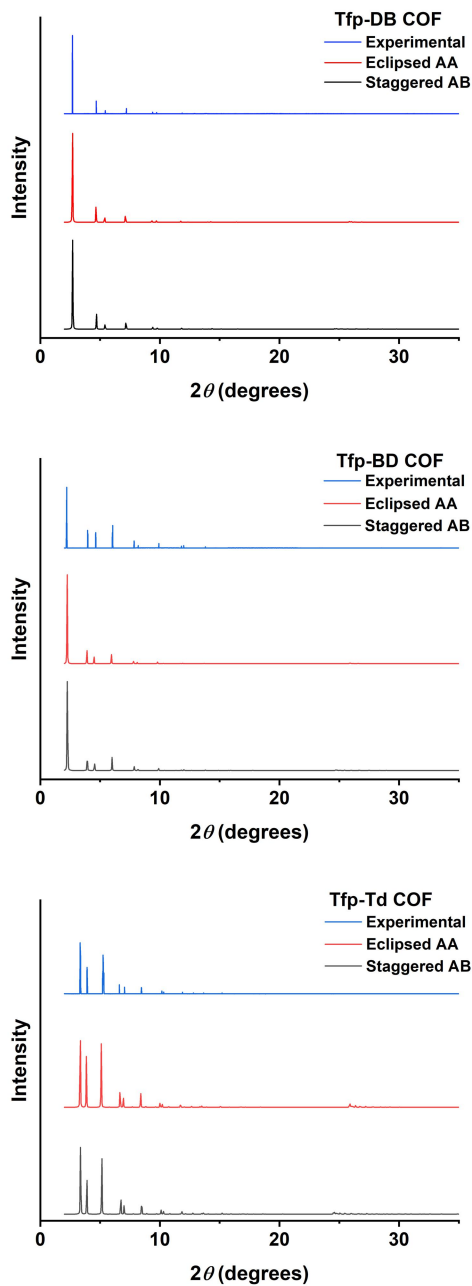

Fig. S1 PXRD patterns (blue, major reflections) and simulations (red and black) profiles of (a) Tfp-DB COF, (b) Tfp-BD COF, (c) Tfp-Td COF.

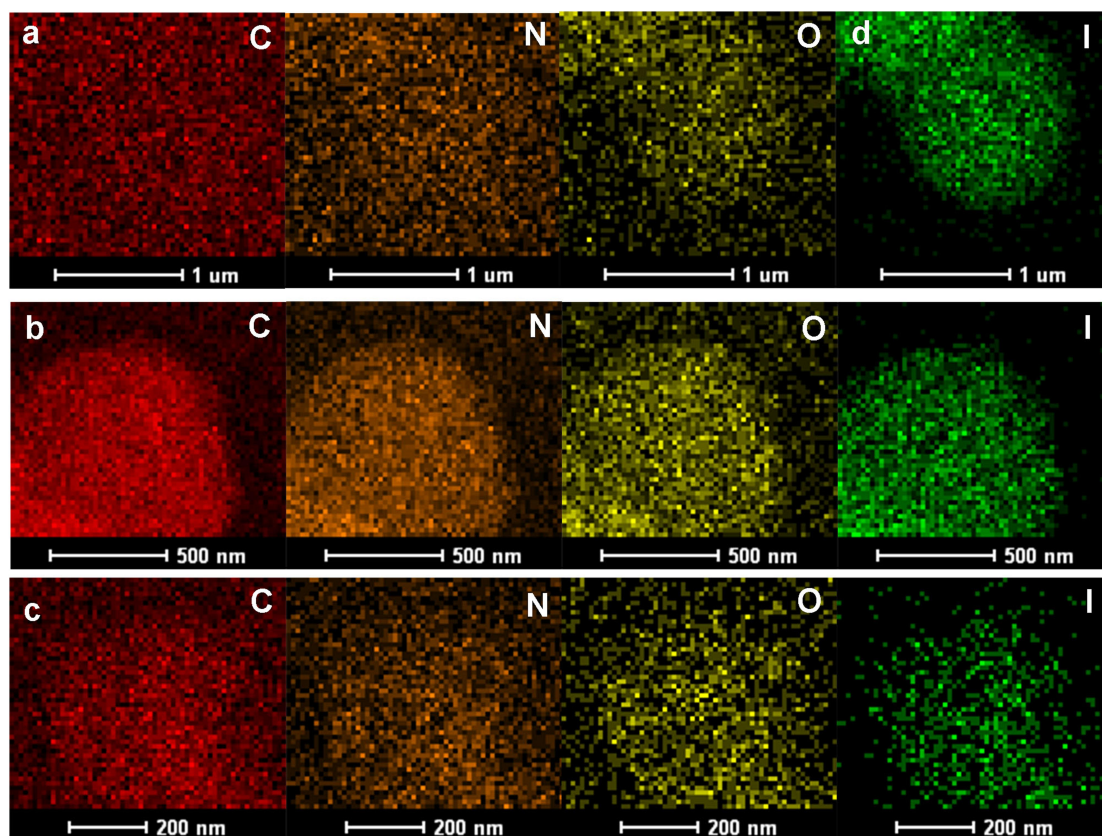

Fig. S2 TEM images of (a) elemental mapping images of iodine-laden Tfp-DB COF, C-K, N-K, O-K, I-K, from left to right respectively, (b) elemental mapping images of iodine-laden Tfp-BD COF, C-K, N-K, O-K, I-K, from left to right respectively, (c) elemental mapping images of iodine-laden Tfp-Td COF, C-K, N-K, O-K, I-K, from left to right respectively.

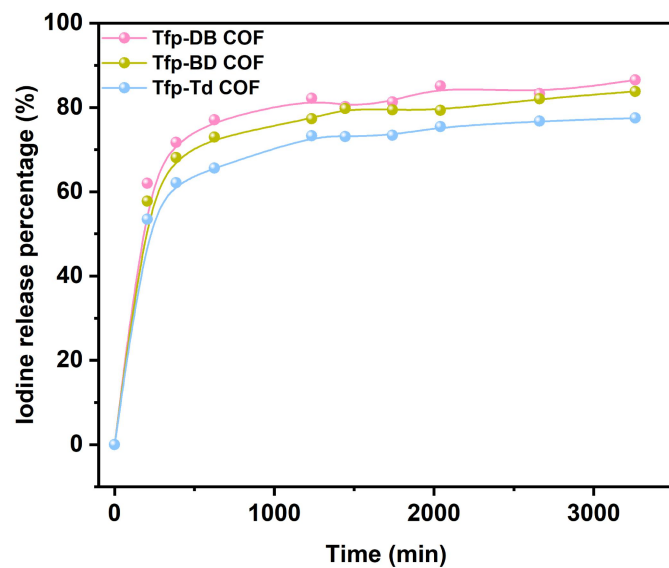

Fig. S3 Desorption isotherm of iodine versus contact time at 120 °C

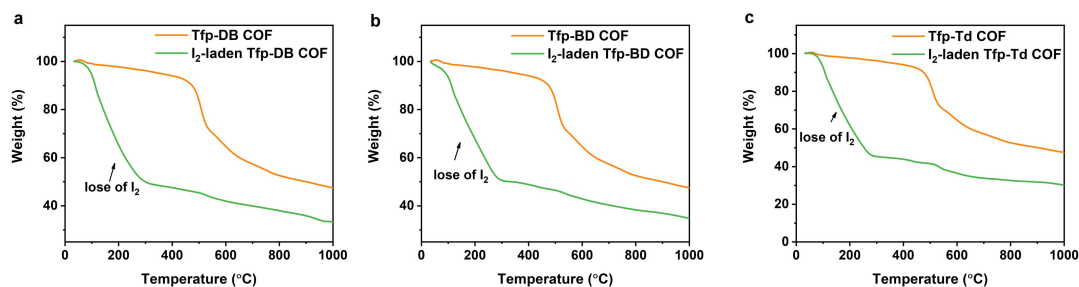

Fig. S4 Thermogravimetric analysis curves of COFs (a) Tfp-DB COF (orange), I<sub>2</sub>-laden Tfp-DB COF (green), (b) Tfp-BD COF (orange), I<sub>2</sub>-laden Tfp-BD COF (green), (c) Tfp-Td COF (orange), I<sub>2</sub>-laden Tfp-Td COF (green).

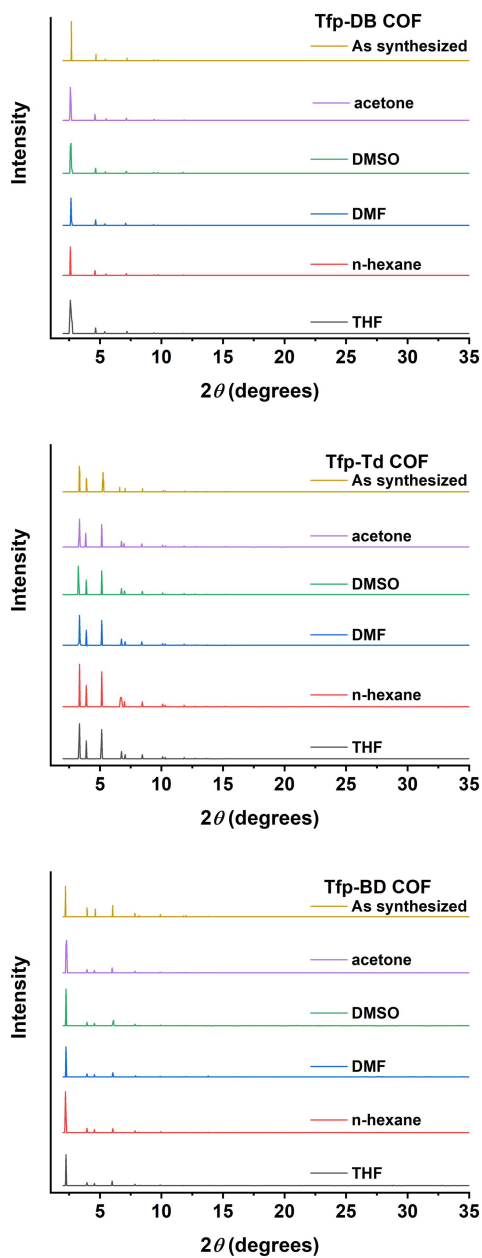

Fig. S5 PXRD patterns of COFs after the treatment in different organic solvents for 7 days. (a) Tfp-DB COF, (b) Tfp-BD COF, (c) Tfp-Td COF.

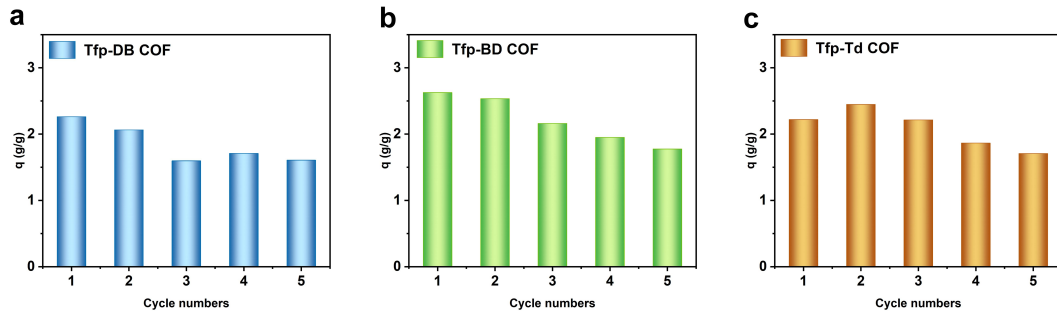

Fig. S6 Recyclability of COFs for  $I_2$  adsorption at 75 °C in saturated iodine vapor. (a) Tfp-DB COF, (b) Tfp-BD COF, (c) Tfp-Td COF.

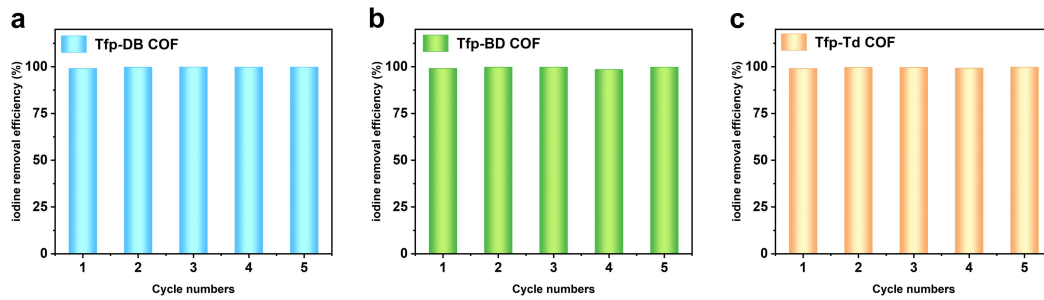

Fig. S7 Recyclability of COFs for  $I_2$  adsorption in the n-hexane solution. (a) Tfp-DB COF, (b) Tfp-BD COF, (c) Tfp-Td COF.

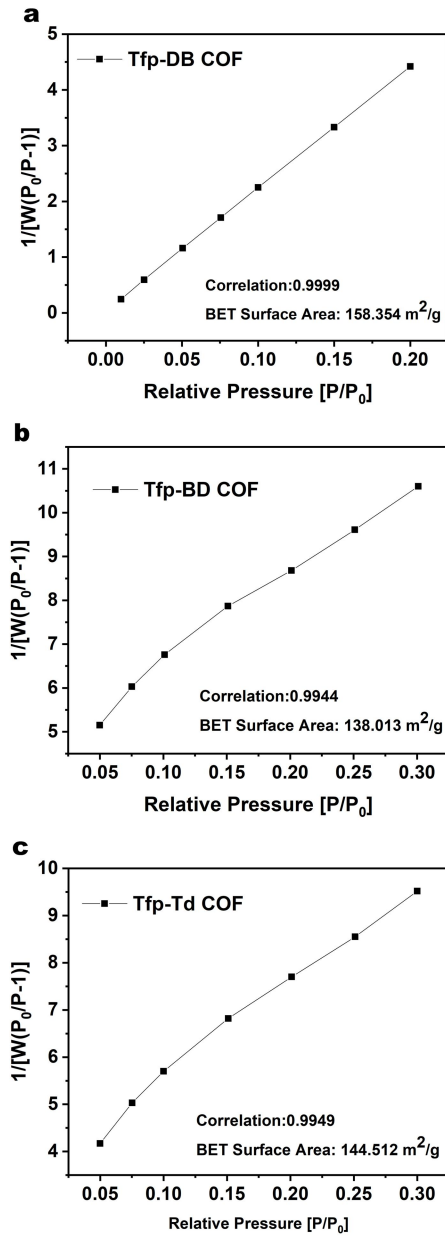

Fig. S8 BET surface area curves for COFs calculated from the N<sub>2</sub> adsorption and desorption. (a) Tfp-DB COF, (b) Tfp-BD COF, (c) Tfp-Td COF.

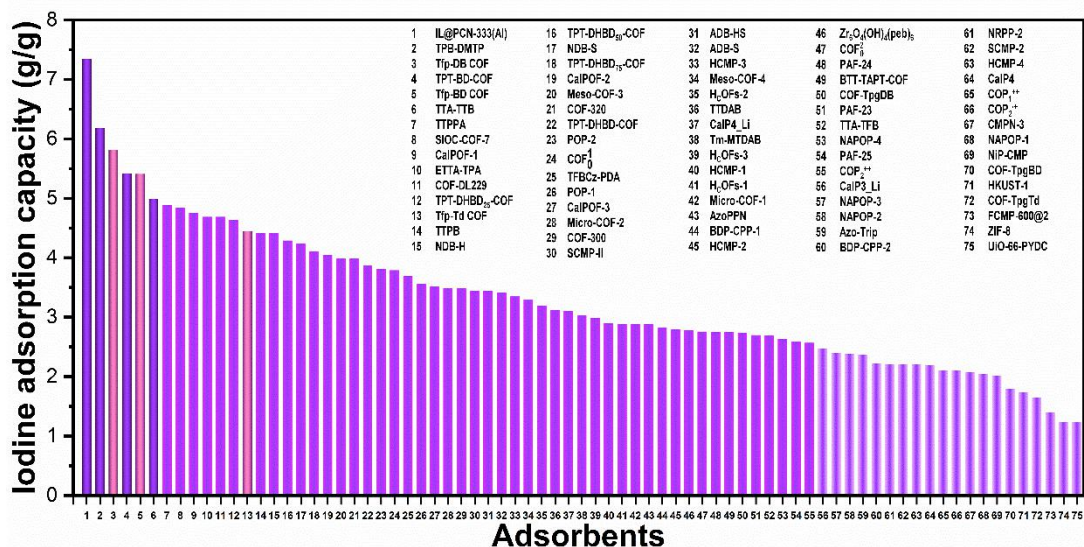

Fig. S9 Iodine adsorption capacities of different adsorbents.

Table S1 Iodine adsorption capacities of different adsorbents.

| Materials                                | Iodine adsorption capacity (g/g) | Ref.      | Materials                                                                         | Iodine adsorption capacity (g/g) | Ref. |
|------------------------------------------|----------------------------------|-----------|-----------------------------------------------------------------------------------|----------------------------------|------|
| IL@PCN-333(Al) <sup>1</sup>              | 7.35                             | S1        | H <sub>c</sub> OFs-3 <sup>2</sup>                                                 | 3.00                             | S2   |
| TPB-DMTP <sup>3</sup>                    | 6.20                             | S3        | HCMP-1 <sup>4</sup>                                                               | 2.91                             | S4   |
| Tfp-DB COF                               | 5.82                             | this work | H <sub>c</sub> OFs-1 <sup>2</sup>                                                 | 2.90                             | S2   |
| TPT-BD-COF <sup>5</sup>                  | 5.43                             | S5        | Micro-COF-1 <sup>6</sup>                                                          | 2.90                             | S6   |
| Tfp-BD COF                               | 5.42                             | this work | AzoPPN <sup>7</sup>                                                               | 2.90                             | S7   |
| TTA-TTB <sup>3</sup>                     | 5.00                             | S3        | BDP-CPP-1 <sup>8</sup>                                                            | 2.83                             | S8   |
| TTPPA <sup>9</sup>                       | 4.90                             | S9        | HCMP-2 <sup>4</sup>                                                               | 2.81                             | S4   |
| SIOC-COF-7 <sup>10</sup>                 | 4.86                             | S10       | Zr <sub>6</sub> O <sub>4</sub> (OH) <sub>4</sub> (peb) <sub>6</sub> <sup>11</sup> | 2.79                             | S11  |
| CaIPOF-1 <sup>12</sup>                   | 4.77                             | S12       | COF <sub>0</sub> <sup>2 13</sup>                                                  | 2.77                             | S13  |
| ETTA-TPA <sup>3</sup>                    | 4.70                             | S3        | PAF-24 <sup>14</sup>                                                              | 2.76                             | S14  |
| COF-DL229 <sup>15</sup>                  | 4.70                             | S15       | BTT-TAPT-COF <sup>16</sup>                                                        | 2.76                             | S16  |
| TPT-DHBD <sub>25</sub> -COF <sup>5</sup> | 4.65                             | S5        | COF-TpgDB <sup>17</sup>                                                           | 2.75                             | S17  |
| Tfp-Td COF                               | 4.45                             | this work | PAF-23 <sup>14</sup>                                                              | 2.71                             | S14  |
| NDB-H <sup>18</sup>                      | 4.43                             | S18       | TTA-TFB <sup>3</sup>                                                              | 2.70                             | S3   |
| TTPB <sup>19</sup>                       | 4.43                             | S19       | NAPOP-4 <sup>20</sup>                                                             | 2.65                             | S20  |
| TPT-DHBD <sub>50</sub> -COF              | 4.30                             | S5        | PAF-25 <sup>14</sup>                                                              | 2.60                             | S14  |



|                                     |      |     |                                     |      |     |
|-------------------------------------|------|-----|-------------------------------------|------|-----|
| 5                                   |      |     |                                     |      |     |
| NDB-S <sup>18</sup>                 | 4.25 | S18 | COP <sub>2</sub> <sup>++13</sup>    | 2.58 | S13 |
| TPT-DHBD <sub>75</sub> -COF         | 4.12 | S5  | CaIP <sub>3</sub> _Li <sup>21</sup> | 2.48 | S21 |
| 5                                   |      |     |                                     |      |     |
| CaIPOF-2 <sup>12</sup>              | 4.06 | S12 | NAPOP-3 <sup>20</sup>               | 2.41 | S20 |
| Meso-COF-3 <sup>6</sup>             | 4.00 | S6  | NAPOP-2 <sup>20</sup>               | 2.39 | S20 |
| COF-320 <sup>6</sup>                | 4.00 | S6  | Azo-Trip <sup>22</sup>              | 2.38 | S22 |
| TPT-DHBD-COF <sup>5</sup>           | 3.88 | S5  | BDP-CPP-2 <sup>8</sup>              | 2.23 | S8  |
| POP-2 <sup>23</sup>                 | 3.82 | S23 | NRPP-2 <sup>24</sup>                | 2.22 | S24 |
| COF <sub>0</sub> <sup>1 13</sup>    | 3.80 | S13 | SCMP-2 <sup>20</sup>                | 2.22 | S20 |
| TFBCz-PDA <sup>3</sup>              | 3.70 | S3  | HCMP-4 <sup>4</sup>                 | 2.22 | S4  |
| POP-1 <sup>23</sup>                 | 3.57 | S23 | CaIP <sub>4</sub> <sup>21</sup>     | 2.20 | S21 |
| CaIPOF-3 <sup>12</sup>              | 3.53 | S12 | COP <sub>1</sub> <sup>++13</sup>    | 2.12 | S13 |
| Micro-COF-2 <sup>6</sup>            | 3.50 | S6  | COP <sub>2</sub> <sup>·+13</sup>    | 2.11 | S13 |
| COF-300 <sup>6</sup>                | 3.50 | S6  | CMPN-3 <sup>25</sup>                | 2.08 | S25 |
| SCMP-II <sup>26</sup>               | 3.45 | S26 | NAPOP-1 <sup>20</sup>               | 2.06 | S20 |
| ADB-HS <sup>18</sup>                | 3.45 | S18 | NiP-CMP <sup>27</sup>               | 2.02 | S27 |
| ADB-S <sup>18</sup>                 | 3.42 | S18 | COF-TpgBD <sup>17</sup>             | 1.81 | S17 |
| HCMP-3 <sup>4</sup>                 | 3.36 | S4  | HKUST-1 <sup>28</sup>               | 1.75 | S28 |
| Meso-COF-4 <sup>6</sup>             | 3.30 | S6  | COF-TpgTd <sup>17</sup>             | 1.66 | S17 |
| H <sub>c</sub> OFs-2 <sup>2</sup>   | 3.20 | S2  | FCMP-600@2 <sup>29</sup>            | 1.41 | S29 |
| TTDAB <sup>9</sup>                  | 3.13 | S9  | ZIF-8 <sup>30</sup>                 | 1.25 | S30 |
| CaIP <sub>4</sub> _Li <sup>21</sup> | 3.12 | S21 | UiO-66-PYDC <sup>30</sup>           | 1.25 | S30 |
| Tm-MTDAB <sup>9</sup>               | 3.04 | S9  |                                     |      |     |

## 2. References

- S1. Y. Tang, H. Huang, J. Li, W. Xue and C. Zhong, *J. Mater. Chem. A*, 2019, **7**, 18324.
- S2. X. Jiang, X. Cui, A. J. E. Duncan, L. Li, R. P. Hughes, R. J. Staples, E. V. Alexandrov, D. M. Proserpio, Y. Wu and C. Ke, *J. Am. Chem. Soc.*, 2019, **141**, 10915.

- S3. P. Wang, Q. Xu, Z. Li, W. Jiang, Q. Jiang and D. Jiang, *Adv. Mater.*, 2018, **30**, 1801991.
- S4. Y. Liao, J. Weber, B. M. Mills, Z. Ren and C. F. J. Faul, *Macromolecules*, 2016, **49**, 6322.
- S5. X. Guo, Y. Tian, M. Zhang, Y. Li, R. Wen, X. Li, X. Li, Y. Xue, L. Ma, C. Xia and S. Li, *Chem. Mater.*, 2018, **30**, 2299.
- S6. S. An, X. Zhu, Y. He, L. Yang, H. Wang, S. Jin, J. Hu and H. Liu, *Ind. Eng. Chem. Res.*, 2019, **58**, 10495.
- S7. H. Li, X. Ding and B.-H. Han, *Chem. – Eur. J.*, 2016, **22**, 11863.
- S8. Y. Zhu, Y.-J. Ji, D.-G. Wang, Y. Zhang, H. Tang, X.-R. Jia, M. Song, G. Yu and G.-C. Kuang, *J. Mater. Chem. A*, 2017, **5**, 6622.
- S9. T. Geng, S. Ye, Z. Zhu and W. Zhang, *J. Mater. Chem. A*, 2018, **6**, 2808.
- S10. Z. J. Yin, S. Q. Xu, T. G. Zhan, Q. Y. Qi, Z. Q. Wu and X. Zhao, *Chem. Commun.*, 2017, **53**, 7266.
- S11. R. J. Marshall, S. L. Griffin, C. Wilson and R. S. Forgan, *Chem. – Eur. J.*, 2016, **22**, 4870.
- S12. K. Su, W. Wang, B. Li and D. Yuan, *Acs Sustainable Chem. Eng.*, 2018, **6**, 17402.
- S13. G. Das, T. Prakasam, S. Nuryyeva, D. S. Han, A. Abdel-Wahab, J.-C. Olsen, K. Polychronopoulou, C. Platas-Iglesias, F. Ravaux, M. Jouiad and A. Trabolsi, *J. Mater. Chem. A*, 2016, **4**, 15361.
- S14. Z. Yan, Y. Yuan, Y. Tian, D. Zhang and G. Zhu, *Angew. Chem. Int. Ed*, 2015, **54**, 12733.
- S15. C. Wang, Y. Wang, R. Ge, X. D. Song, X. Q. Xing, Q. K. Jiang, H. Lu, C. Hao, X. W. Guo, Y. A. Gao and D. L. Jiang, *Chem. – Eur. J.*, 2018, **24**, 585.
- S16. X. Pan, X. Qin, Q. Zhang, Y. Ge, H. Ke and G. Cheng, *Microporous Mesoporous Mater*, 2020, **296**, p. 109990.
- S17. Y. Sun, S. Song, D. Xiao, L. Gan and Y. Wang, *Acs Omega*, 2020, **5**, 24262.
- S18. Z. Guo, P. Sun, X. Zhang, J. Lin, T. Shi, S. Liu, A. Sun and Z. Li, *Chem. – Asian J.*, 2018, **13**, 2046.
- S19. T. Geng, Z. Zhu, W. Zhang and Y. Wang, *J. Mater. Chem. A*, 2017, **5**, 7612.
- S20. J.-Y. Weng, Y.-L. Xu, W.-C. Song and Y.-H. Zhang, *J. Polym. Sci., Polym. Chem.*, 2016, **54**, 1724.
- S21. D. Shetty, J. Raya, D. S. Han, Z. Asfari, J.-C. Olsen and A. Trabolsi, *Chem. Mater.*, 2017, **29**, 8968.
- S22. Q. Q. Dang, X. M. Wang, Y. F. Zhan and X. M. Zhang, *Polym. Chem.*, 2016, **7**, 643.
- S23. X. Qian, B. Wang, Z.-Q. Zhu, H.-X. Sun, F. Ren, P. Mu, C. Ma, W.-D. Liang and A. Li, *J. Hazard. Mater.*, 2017, **338**, 224.
- S24. Y. H. Abdelmoaty, T.-D. Tessema, F. A. Choudhury, O. M. El-Kadri and H. M. El-Kaderi, *Acs Appl. Mater. Interfaces*, 2018, **10**, 16049.
- S25. Y. Chen, H. Sun, R. Yang, T. Wang, C. Pei, Z. Xiang, Z. Zhu, W. Liang, A. Li

- and W. Deng, *J. Mater. Chem. A*, 2015, **3**, 87.
- S26. F. Ren, Z. Zhu, X. Qian, W. Liang, P. Mu, H. Sun, J. Liu and A. Li, *Chem. Commun.*, 2016, **52**, 9797.
- S27. S. A, Y. Zhang, Z. Li, H. Xia, M. Xue, X. Liu and Y. Mu, *Chem. Commun.*, 2014, **50**, 8495.
- S28. D. F. Sava, K. W. Chapman, M. A. Rodriguez, J. A. Greathouse, P. S. Crozier, H. Zhao, P. J. Chupas and T. M. Nenoff, *Chem. Mater.*, 2013, **25**, 2591.
- S29. G. Y. Li, C. Yao, J. K. Wang and Y. H. Xu, *Sci. Rep.*, 2017, **7**, 13972.
- S30. G. Mehlana, G. Ramon and S. A. Bourne, *Microporous Mesoporous Mater.*, 2016, **231**, 21.
